# Supplementary material for: Molecular Hydrogen Inhibits Colorectal Cancer Growth via the AKT/SCD1 Signaling Pathway
Source: PubMed Central journal article supplement (PMC9071919; doi:10.1155/2022/8024452), 2022-04-26
Supplement: 8024452.f1.pdf [file 8024452.f1.pdf]

**A****RKO****CTRL**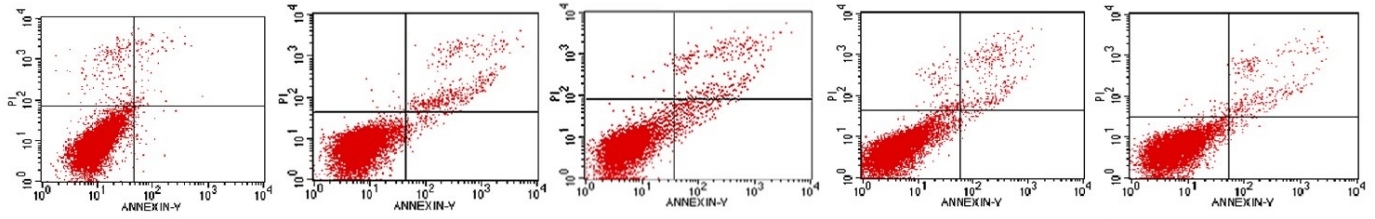**50%H<sub>2</sub>**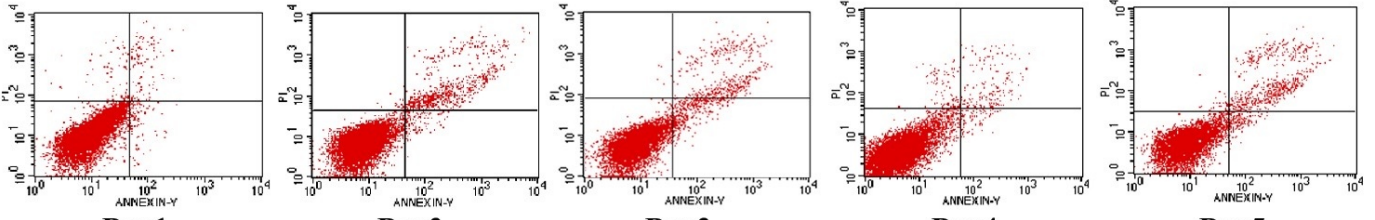**Day1****Day2****Day3****Day4****Day5****B****SW480****CTRL**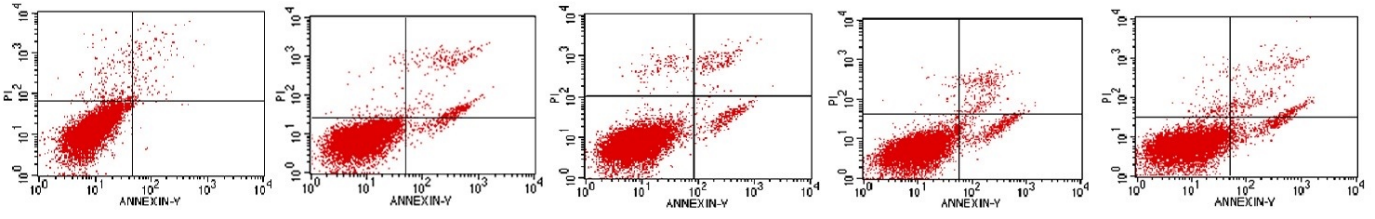**50%H<sub>2</sub>**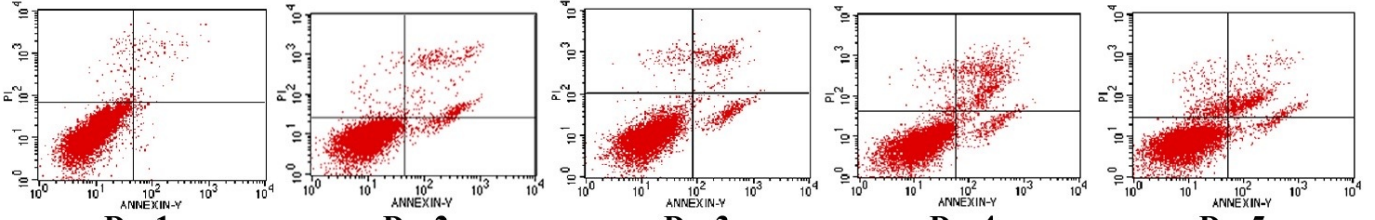**Day1****Day2****Day3****Day4****Day5**
